# Supplementary material for: Structural insights into the allosteric inhibition of P2X4 receptors
Source: PubMed Central journal article supplement (PMC10575874; doi:10.1038/s41467-023-42164-y), 2023-10-13
Supplement: 41467_2023_42164_MOESM3_ESM.pdf [file 41467_2023_42164_MOESM3_ESM.pdf]

## **Description of Additional Supplementary Files Document**

**Supplementary Dataset 1** - AlphaFold prediction model and log files from ColabFold for human P2X1

**Supplementary Dataset 2** - AlphaFold prediction model and log files from ColabFold for human P2X2.

**Supplementary Movie 1** - BX430-dependent structural changes of zfP2X4.
